# Supplementary material for: Myxococcus xanthus DK1622 Coordinates Expressions of the Duplicate groEL and Single groES Genes for Synergistic Functions of GroELs and GroES
Source: PubMed Central journal article supplement (PMC5406781; doi:10.3389/fmicb.2017.00733), 2017-04-27
Supplement: Table4.pdf [file Table4.pdf]

**Supplementary Table S4.** The occurrence of *groEL* and *groES* genes in 24 sequenced mycobacterial genomes.

| strain                                     | locus_tag       | name          | strand | accession      |
|--------------------------------------------|-----------------|---------------|--------|----------------|
| <i>Anaeromyxobacter dehalogenans</i> 2CP-1 | A2CP1_RS07860   | <i>groEL2</i> | +      | WP_012632845.1 |
| <i>Anaeromyxobacter dehalogenans</i> 2CP-1 | A2CP1_RS18815   | <i>groES</i>  | +      | WP_011422641.1 |
| <i>Anaeromyxobacter dehalogenans</i> 2CP-1 | A2CP1_RS18820   | <i>groEL1</i> | +      | WP_015934824.1 |
| <i>Anaeromyxobacter dehalogenans</i> 2CP-C | ADEH_RS12380    | <i>groEL2</i> | -      | WP_011421446.1 |
| <i>Anaeromyxobacter dehalogenans</i> 2CP-C | ADEH_RS18565    | <i>groES</i>  | +      | WP_011422641.1 |
| <i>Anaeromyxobacter dehalogenans</i> 2CP-C | ADEH_RS18570    | <i>groEL1</i> | +      | WP_011422642.1 |
| <i>Anaeromyxobacter</i> sp. Fw109-5        | ANAE109_RS07500 | <i>groEL2</i> | +      | WP_011985785.1 |
| <i>Anaeromyxobacter</i> sp. Fw109-5        | ANAE109_RS19060 | <i>groES</i>  | +      | WP_012098520.1 |
| <i>Anaeromyxobacter</i> sp. Fw109-5        | ANAE109_RS19065 | <i>groEL1</i> | +      | WP_012098521.1 |
| <i>Anaeromyxobacter</i> sp. K              | ANAEK_RS07370   | <i>groEL2</i> | +      | WP_012525521.1 |
| <i>Anaeromyxobacter</i> sp. K              | ANAEK_RS18410   | <i>groES</i>  | +      | WP_011422641.1 |
| <i>Anaeromyxobacter</i> sp. K              | ANAEK_RS18415   | <i>groEL1</i> | +      | WP_012527640.1 |
| <i>Archangium gephyra</i> DSM 2261         | AA314_RS19345   | <i>groEL1</i> | -      | WP_047856671.1 |
| <i>Archangium gephyra</i> DSM 2261         | AA314_RS19350   | <i>groES</i>  | -      | WP_043396073.1 |
| <i>Archangium gephyra</i> DSM 2261         | AA314_RS21800   | <i>groEL2</i> | +      | WP_047857048.1 |
| <i>Chondromyces apiculatus</i> DSM 436     | CAP_RS19785     | <i>groEL</i>  | -      | WP_044243374.1 |
| <i>Chondromyces apiculatus</i> DSM 436     | CAP_RS19790     | <i>groES</i>  | -      | WP_044243376.1 |
| <i>Chondromyces apiculatus</i> DSM 436     | CAP_RS00265     | <i>groEL</i>  | -      | WP_044234642.1 |
| <i>Chondromyces apiculatus</i> DSM 436     | CAP_RS00270     | <i>groES</i>  | -      | WP_044234644.1 |
| <i>Chondromyces crocatus</i> Cm c5         | CMC5_RS18270    | <i>groES</i>  | +      | WP_050431631.1 |
| <i>Chondromyces crocatus</i> Cm c5         | CMC5_RS18275    | <i>groEL</i>  | +      | WP_050431632.1 |
| <i>Chondromyces crocatus</i> Cm c5         | CMC5_RS36310    | <i>groES</i>  | +      | WP_050434698.1 |
| <i>Chondromyces crocatus</i> Cm c5         | CMC5_RS36315    | <i>groEL</i>  | +      | WP_050434699.1 |
| <i>Corallocooccus coralloides</i> DSM 2259 | COCOR_RS12630   | <i>groEL1</i> | -      | WP_014395361.1 |
| <i>Corallocooccus coralloides</i> DSM 2259 | COCOR_RS12635   | <i>groES</i>  | -      | WP_014395362.1 |
| <i>Corallocooccus coralloides</i> DSM 2259 | COCOR_RS16530   | <i>groEL2</i> | +      | WP_014396128.1 |
| <i>Cystobacter fuscus</i> DSM 2262         | D187_RS22520    | <i>groEL1</i> | -      | WP_043431189.1 |
| <i>Cystobacter fuscus</i> DSM 2262         | D187_RS22525    | <i>groES</i>  | -      | WP_002624038.1 |
| <i>Cystobacter fuscus</i> DSM 2262         | D187_RS38105    | <i>groEL</i>  | -      | WP_002630326.1 |

|                                            |                    |               |   |                |
|--------------------------------------------|--------------------|---------------|---|----------------|
| <i>Cystobacter fuscus</i> DSM 2262         | D187_RS38365       | <i>groEL2</i> | + | WP_002630378.1 |
| <i>Cystobacter violaceus</i> Cb vi76       | Q664_RS39225       | <i>groEL2</i> | + | WP_043408220.1 |
| <i>Cystobacter violaceus</i> Cb vi76       | Q664_RS17205       | <i>groEL1</i> | - | WP_043396071.1 |
| <i>Cystobacter violaceus</i> Cb vi76       | Q664_RS17210       | <i>groES</i>  | - | WP_043396073.1 |
| <i>Haliangium ochraceum</i> DSM 14365      | HOCH_RS26645       | <i>groES</i>  | + | WP_012830442.1 |
| <i>Haliangium ochraceum</i> DSM 14365      | HOCH_RS26650       | <i>groEL</i>  | + | WP_012830443.1 |
| <i>Haliangium ochraceum</i> DSM 14365      | HOCH_RS32730       | <i>groEL</i>  | - | WP_012831647.1 |
| <i>Haliangium ochraceum</i> DSM 14365      | HOCH_RS32735       | <i>groES</i>  | - | WP_012831648.1 |
| <i>Hyalangium minutum</i> DSM 14724        | DB31_RS11645       | <i>groEL2</i> | + | WP_044186442.1 |
| <i>Hyalangium minutum</i> DSM 14724        | DB31_RS22055       | <i>groES</i>  | + | WP_044191117.1 |
| <i>Hyalangium minutum</i> DSM 14724        | DB31_RS22060       | <i>groEL1</i> | + | WP_044191118.1 |
| <i>Myxococcus fulvus</i> 124B02            | MFUL124B02_RS27270 | <i>groEL2</i> | - | WP_046714602.1 |
| <i>Myxococcus fulvus</i> 124B02            | MFUL124B02_RS29475 | <i>groES</i>  | + | WP_013941457.1 |
| <i>Myxococcus fulvus</i> 124B02            | MFUL124B02_RS29480 | <i>groEL1</i> | + | WP_046714963.1 |
| <i>Myxococcus fulvus</i> HW-1              | LILAB_RS29980      | <i>groEL2</i> | - | WP_013941070.1 |
| <i>Myxococcus fulvus</i> HW-1              | LILAB_RS31935      | <i>groES</i>  | + | WP_013941457.1 |
| <i>Myxococcus fulvus</i> HW-1              | LILAB_RS31940      | <i>groEL1</i> | + | WP_013941458.1 |
| <i>Myxococcus stipitatus</i> DSM 14675     | MYSTI_RS24550      | <i>groEL2</i> | - | WP_015350497.1 |
| <i>Myxococcus stipitatus</i> DSM 14675     | MYSTI_RS26680      | <i>groES</i>  | + | WP_015350918.1 |
| <i>Myxococcus stipitatus</i> DSM 14675     | MYSTI_RS26685      | <i>groEL1</i> | + | WP_015350919.1 |
| <i>Myxococcus xanthus</i> DK 1622          | MXAN_RS21695       | <i>groEL2</i> | - | WP_011554465.1 |
| <i>Myxococcus xanthus</i> DK 1622          | MXAN_RS23760       | <i>groES</i>  | + | WP_002640434.1 |
| <i>Myxococcus xanthus</i> DK 1622          | MXAN_RS23765       | <i>groEL1</i> | + | WP_011554876.1 |
| <i>Myxococcus xanthus</i> DZ2              | MXDZ_RS0219785     | <i>groEL2</i> | + | WP_011554465.1 |
| <i>Myxococcus xanthus</i> DZ2              | MXDZ_RS0233565     | <i>groES</i>  | + | WP_002640434.1 |
| <i>Myxococcus xanthus</i> DZ2              | MXDZ_RS0233570     | <i>groEL1</i> | + | WP_011554876.1 |
| <i>Myxococcus xanthus</i> DZF1             | MXF1_RS0137875     | <i>groEL2</i> | + | WP_011554465.1 |
| <i>Myxococcus xanthus</i> DZF1             | MXF1_RS0133640     | <i>groES</i>  | + | WP_002640434.1 |
| <i>Myxococcus xanthus</i> DZF1             | MXF1_RS0133645     | <i>groEL1</i> | + | WP_011554876.1 |
| <i>Plesiocystis pacifica</i> SIR-1         | PPSIR1_RS03005     | <i>groEL</i>  | - | WP_006969504.1 |
| <i>Plesiocystis pacifica</i> SIR-1         | PPSIR1_RS03010     | <i>groES</i>  | - | WP_006969505.1 |
| <i>Sandaracinus amylolyticus</i> DSM 53668 | DB32_RS16520       | <i>groEL</i>  | - | WP_053233422.1 |
| <i>Sandaracinus amylolyticus</i> DSM 53668 | DB32_RS16525       | <i>groES</i>  | - | WP_053233423.1 |

|                                          |                 |               |   |                |
|------------------------------------------|-----------------|---------------|---|----------------|
| <i>Sorangium cellulosum</i> So ce56      | SCE_RS14260     | <i>groES</i>  | + | WP_012235412.1 |
| <i>Sorangium cellulosum</i> So ce56      | SCE_RS14265     | <i>groEL</i>  | + | WP_012235413.1 |
| <i>Sorangium cellulosum</i> So ce56      | SCE_RS30385     | <i>groES</i>  | + | WP_012238539.1 |
| <i>Sorangium cellulosum</i> So ce56      | SCE_RS30390     | <i>groEL</i>  | + | WP_012238540.1 |
| <i>Sorangium cellulosum</i> So0157-2     | SCE1572_RS17550 | <i>groES</i>  | + | WP_020735364.1 |
| <i>Sorangium cellulosum</i> So0157-2     | SCE1572_RS17555 | <i>groEL</i>  | + | WP_020735365.1 |
| <i>Sorangium cellulosum</i> So0157-2     | SCE1572_RS36395 | <i>groES</i>  | + | WP_020738934.1 |
| <i>Sorangium cellulosum</i> So0157-2     | SCE1572_RS36400 | <i>groEL</i>  | + | WP_020738935.1 |
| <i>Sorangium cellulosum</i> So0157-2     | SCE1572_RS37890 | <i>groEL</i>  | + | WP_020739228.1 |
| <i>Stigmatella aurantiaca</i> DW4/3-1    | STAUR_RS23745   | <i>groEL2</i> | - | WP_002615259.1 |
| <i>Stigmatella aurantiaca</i> DW4/3-1    | STAUR_RS27970   | <i>groES</i>  | + | WP_002615502.1 |
| <i>Stigmatella aurantiaca</i> DW4/3-1    | STAUR_RS27975   | <i>groEL1</i> | + | WP_013376916.1 |
| <i>Vulgatibacter incomptus</i> DSM 27710 | AKJ08_RS08640   | <i>groES</i>  | + | WP_050725696.1 |
| <i>Vulgatibacter incomptus</i> DSM 27710 | AKJ08_RS08645   | <i>groEL</i>  | + | WP_050725697.1 |
